# Supplementary material for: Visualisation of the T cell differentiation programme by Canonical Correspondence Analysis of transcriptomes
Source: PubMed Central journal article supplement (PMC4258272; doi:10.1186/1471-2164-15-1028), 2014-11-27

Figure S2

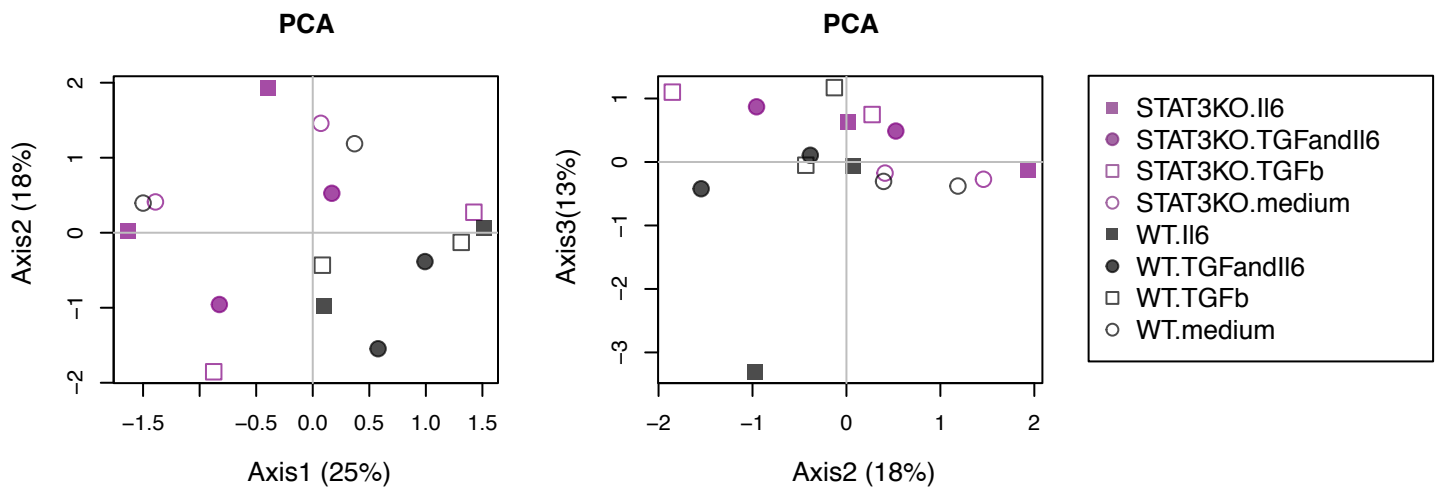

Supplement: 12864_2014_6722_MOESM2_ESM.pdf [file 12864_2014_6722_MOESM2_ESM.pdf]
